# Supplementary material for: Race and Pulse Oximetry in Infants With Single Ventricles Undergoing Stage 1 Palliation
Source: PubMed Central journal article supplement (PMC10998150; doi:10.1001/jamanetworkopen.2024.5369), 2024-04-05
Supplement: jamanetwopen-e245369-s001.pdf [file jamanetwopen-e245369-s001.pdf]

## Data Sharing Statement

Mills. Race and Pulse Oximetry in Infants With Single Ventricles Undergoing Stage 1 Palliation. *JAMA Netw Open*. Published April 05, 2024. doi:10.1001/jamanetworkopen.2024.5369

### Data

**Data available:** Yes

**Data types:** Deidentified participant data

**How to access data:** Data available upon request to [mfmill6@emory.edu](mailto:mfmill6@emory.edu)

**When available:** With publication

### Supporting Documents

**Document types:** Statistical/analytic code

**How to access documents:** Documents available upon request to [mfmill6@emory.edu](mailto:mfmill6@emory.edu)

**When available:** With publication

### Additional Information

**Who can access the data:** Researchers and reviewers whose proposed use of the data has been approved.

**Types of analyses:** For specified purposes.

**Mechanisms of data availability:** After approval of a proposal.
